# Supplementary material for: NFκB inhibition to lift the mechano-competence of mesenchymal stromal cell-derived neocartilage toward articular chondrocyte levels
Source: PubMed Central journal article supplement (PMC9044876; doi:10.1186/s13287-022-02843-x), 2022-04-27
Supplement: 13287_2022_2843_MOESM1_ESM.pdf [file 13287_2022_2843_MOESM1_ESM.pdf]

Electronic supplementary material for:

**NFκB inhibition to lift the mechano-competence of mesenchymal stromal cell-derived neocartilage toward articular chondrocyte levels**

Janine Lückgen<sup>1</sup>, Elisabeth Raqué<sup>1</sup>, Tobias Reiner<sup>2</sup>, Solvig Diederichs<sup>1</sup> and Wiltrud Richter<sup>1\*</sup>

\*To whom correspondence should be addressed:

E-mail: [wiltrud.richter@med.uni-heidelberg.de](mailto:wiltrud.richter@med.uni-heidelberg.de)

This pdf file includes:

Supplementary Fig. S1-S4

Supplementary Table S1

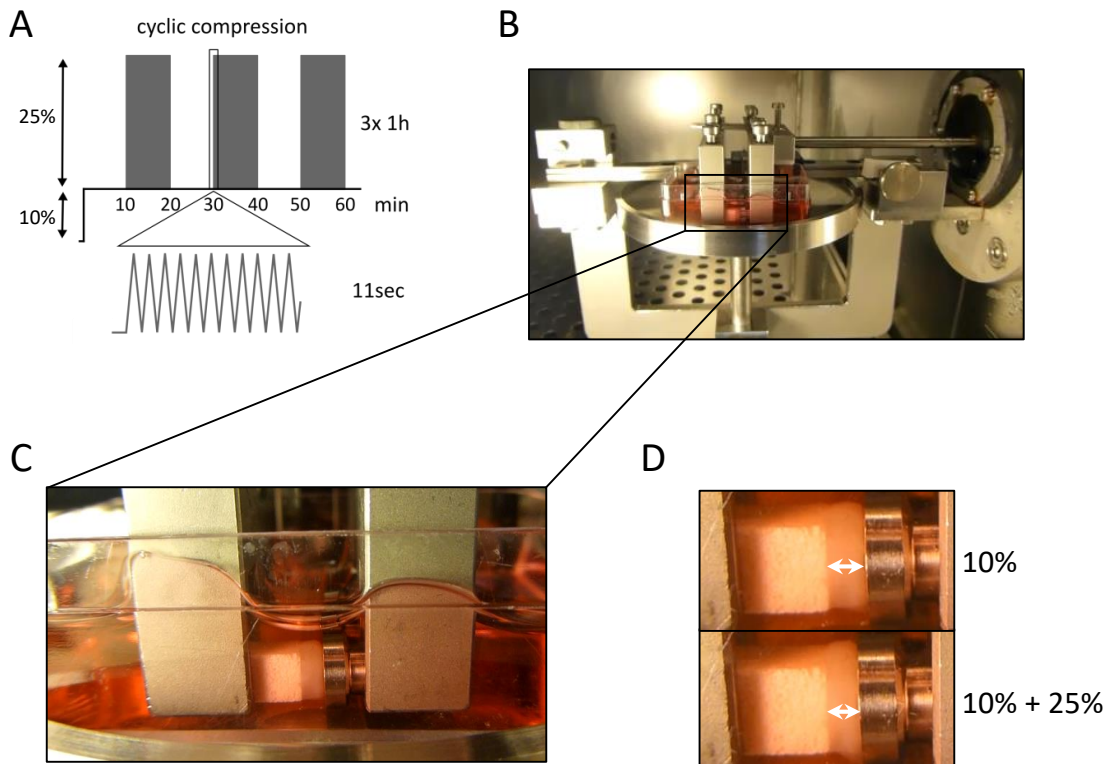

**Supplementary Fig. S1. Loading conditions.** AC- and MSC-seeded osteochondral units were subjected to a single 3-h cyclic compression episode in a custom-made bioreactor. **(A)** Schematic visualization of the applied loading protocol. **(B)** Representative picture of samples placed in the bioreactor. **(C)** Close-up picture of samples placed in the bioreactor. The piston touches the chondral phase of the osteochondral unit. **(D)** The 10% static offset and the superimposed additional 25% compression is shown for a representative sample.

A

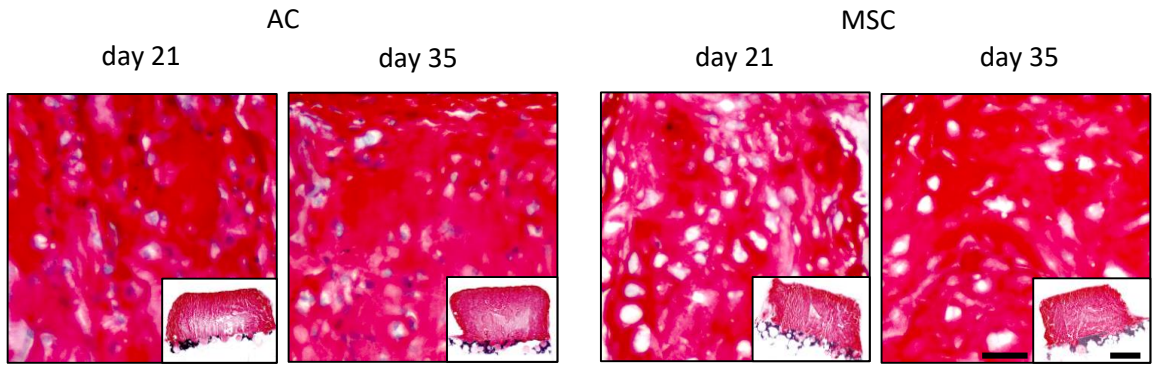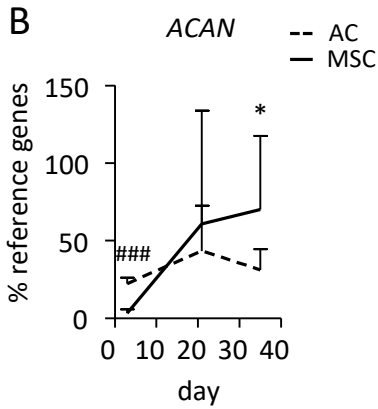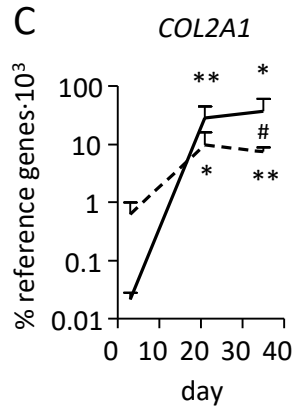

**Supplementary Fig. S2. Characterization of AC- and MSC-derived engineered cartilage.** Biphasic osteochondral units were seeded with  $5 \times 10^5$  human articular chondrocytes (AC) or mesenchymal stromal cells (MSC) and cultured for 3, 21 or 35 days under chondrogenic conditions. **(A)** Collagen type II was detected by immunohistochemistry of standard paraffin sections. Black: left-over  $\beta$ -TCP (scale bar: 50  $\mu$ m (inset: 1 mm)); representative pictures are shown;  $n=4-8$  donors per group). **(B, C)** Mean gene expression  $\pm$  SD is given as percentage of the mean levels of reference genes *HNRPH1* and *CPSF6* ( $n=3-8$  donors). Two-tailed t-test with Bonferroni post-hoc test, \* $p \leq 0.05$ , \*\* $p \leq 0.01$ , \*\*\* $p \leq 0.001$  in comparison to day 3, # $p \leq 0.05$ , ### $p \leq 0.001$  AC vs. MSC at the same time point.

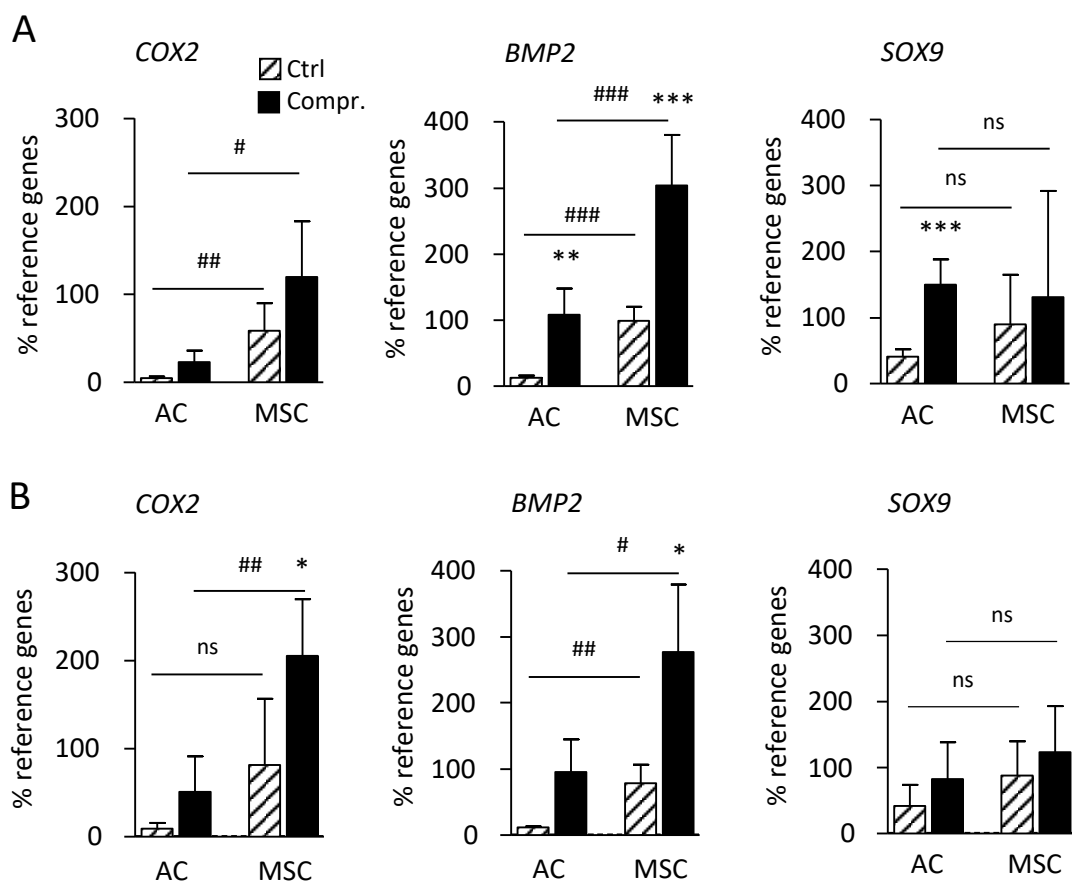

**Supplementary Fig. S3. Comparison of gene expression levels in AC- vs. MSC-derived cartilage.**

RNA was isolated at termination of loading of compressed samples and free-swelling controls and gene-specific mRNA levels were determined by qPCR. **(A)** *COX2*, *BMP2* and *SOX9* expression levels in AC- and MSC-derived cartilage on day 21. **(B)** *COX2*, *BMP2* and *SOX9* expression levels in AC- and MSC-derived cartilage on day 35. Gene expression was normalized to reference genes *HNRPH1* and *CPSF6*. T-test with Bonferroni correction, \* $p \leq 0.05$ , \*\* $p \leq 0.01$ , \*\*\* $p \leq 0.001$  compressed vs. free-swelling controls, # $p \leq 0.05$ , ## $p \leq 0.01$ , ### $p \leq 0.001$  AC vs. MSC (n=4-8).

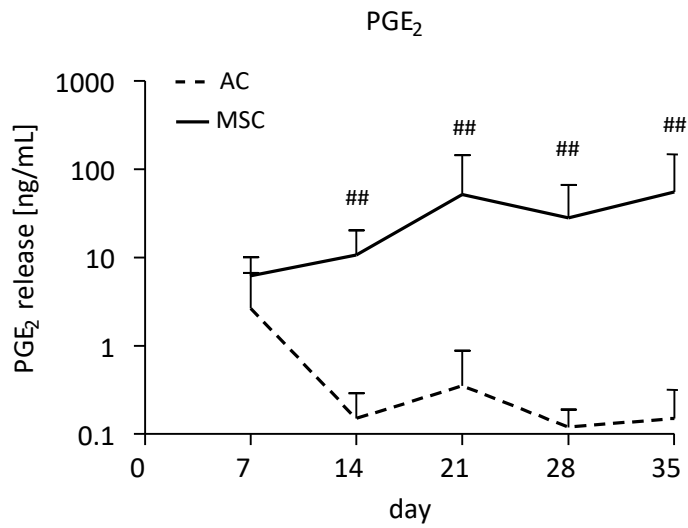

**Supplementary Fig. S4. PGE<sub>2</sub> release from AC and MSC pellets cultured under chondrogenic conditions over time.** Conditioned medium supernatants (2 days) from AC and MSC-derived chondrocyte pellets were collected weekly and analyzed for PGE<sub>2</sub> content by ELISA (n=6 donors). Mann-Whitney U test, ###p ≤ 0.01 AC vs. MSC at the same time point.

**Supplementary Table S1.** List of qRT-PCR primers used in this study

---

| <b>Gene Name</b> | <b>Sequence (5'-3')</b>                                |
|------------------|--------------------------------------------------------|
| <i>ACAN</i>      | GCACATGCCTTCTGCTT<br>GGAACCACTTGGGTCACG                |
| <i>BMP2</i>      | ACGAGGTCCTGAGCGAGTTC<br>GAAGCTCTGCTGAGGTGATAA          |
| <i>BMP6</i>      | ATTACAACAGCAGTGAATTGA<br>TTCATGTGTGCGTTGAGTG           |
| <i>COL2A1</i>    | TGGCCTGAGACAGCATGAC<br>AGTGTTGGGAGCCAGATTGT            |
| <i>COX2</i>      | TTCAAATGAGATTGTGGAAAATTGCT<br>AGATCATCTCTGCCTGAGTATCTT |
| <i>CPSF6</i>     | AAGATTGCCTTCATGGAATTGAG<br>TCGTGATCTACTATGGTCCCTCTCT   |
| <i>DUSP5</i>     | CTCCCACTTTCAAGAAGCAA<br>GGCAGGATCTCAGATTCGTA           |
| <i>FOS</i>       | TCCAGTGCCAACTTCATTCC<br>GCTGCAGCCATCTTATTCT            |
| <i>FOSB</i>      | CCAGGGAAATGTTTCAGGCT<br>GAAGAGATGAGGGTGGGTTG           |
| <i>HNRPH1</i>    | GATGTAGCAAGGAAGAAATTGTTTCAG<br>CACCGGCAATGTTATCCCAT    |
| <i>SOX9</i>      | GTACCCGCACTTGCACAAC<br>TCGCTCTCGTTCAGAAGTCTC           |

---
